# Supplementary material
Source: PubMed Central journal article supplement (PMC11028729)
Supplement: 262_2015_1701_MOESM1_ESM.pdf [file 262_2015_1701_MOESM1_ESM.pdf]

**Supplementary Table S1. The clinical characteristics of patients with MPE**

| Clinical parameters               | Patients with MPE (n=50) |                  |                 |
|-----------------------------------|--------------------------|------------------|-----------------|
|                                   | Lung                     | Squamous-cell    | Small-cell lung |
|                                   | adenocarcinoma           | carcinoma of the | carcinoma       |
|                                   | (n=24)                   | lung (n=17)      | (n=9)           |
| Sex (Male/Female)                 | 18/6                     | 12/5             | 6/3             |
| Age ( $\bar{x} \pm SD$ )          | 61.2 $\pm$ 3.4           | 65.3 $\pm$ 3.7   | 63.8 $\pm$ 3.5  |
| Smoking (Yes/No)                  | 15/9                     | 8/9              | 6/3             |
| Lymph node<br>metastasis (Yes/No) | 22/2                     | 17/0             | 8/1             |

**Supplementary Table S2. The clinical characteristics of patients with NMPE**

| Clinical parameters      | Patients with NMPE (n=50) |                        |                                             |
|--------------------------|---------------------------|------------------------|---------------------------------------------|
|                          | Pneumonia<br>(n=19)       | Tuberculosis<br>(n=17) | Heart failure/<br>Hypoproteinemia<br>(n=14) |
| Sex (Male/Female)        | 8/11                      | 13/4                   | 6/8                                         |
| Age ( $\bar{x} \pm SD$ ) | 57.3 $\pm$ 5.2            | 43.1 $\pm$ 9.6         | 61.6 $\pm$ 4.8                              |
| Smoking (Yes/No)         | 7/12                      | 5/12                   | 8/6                                         |

**Supplementary Table S3. The phenotype analysis of CD163+CD14+ cells and cytological analysis of 20 cases with MPE**

| Patients<br>No. | CD163+CD14+<br>cells<br>(%) | Cytological<br>analysis<br>(first time) | Cytological<br>analysis<br>(second time) | Cytological<br>analysis<br>(third time) |
|-----------------|-----------------------------|-----------------------------------------|------------------------------------------|-----------------------------------------|
| 1               | 6.3                         | —                                       | —                                        | +                                       |
| 2               | 12.1                        | —                                       | +                                        |                                         |
| 3               | 3.9                         | —                                       | —                                        | +                                       |
| 4               | 16.7                        | —                                       | —                                        | +                                       |
| 5               | 21.0                        | —                                       | —                                        | +                                       |
| 6               | 10.1                        | —                                       | —                                        | +                                       |
| 7               | 26.0                        | —                                       | +                                        |                                         |
| 8               | 15.6                        | —                                       | —                                        | +                                       |
| 9               | 8.3                         | —                                       | —                                        | +                                       |
| 10              | 11.1                        | —                                       | —                                        | +                                       |
| 11              | 6.9                         | —                                       | —                                        | +                                       |
| 12              | 5.2                         | —                                       | —                                        | +                                       |
| 13              | 19.2                        | —                                       | —                                        | +                                       |
| 14              | 15.8                        | —                                       | —                                        | +                                       |
| 15              | 12.2                        | —                                       | —                                        | +                                       |
| 16              | 8.9                         | —                                       | —                                        | +                                       |
| 17              | 6.4                         | —                                       | —                                        | +                                       |
| 18              | 5.3                         | —                                       | —                                        | +                                       |
| 19              | 28.5                        | —                                       | +                                        |                                         |
| 20              | 22.7                        | —                                       | +                                        |                                         |

# Supplementary Figure S1

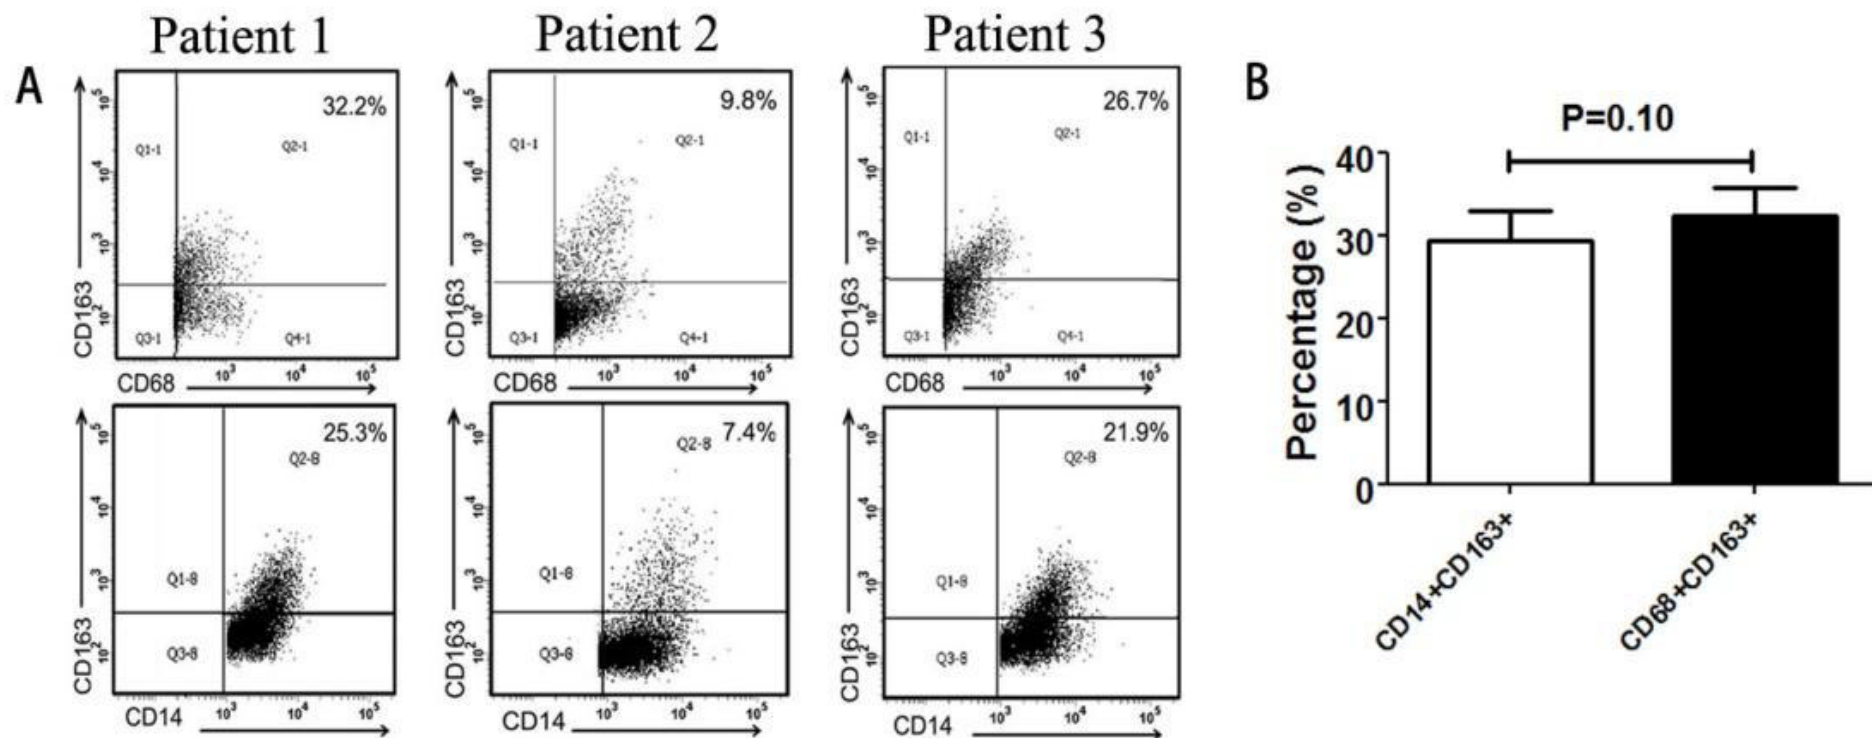

**Supplementary Figure S1. Comparison of phenotype analysis of CD68+CD163+ and CD14+CD163+ cells in MPE (n = 30).**

**A**, CD163, CD68 and CD14 were labeled on mononuclear cells in MPE. The cell population in the dot plots was gated on CD68+ or CD14+ cells. Three representative analyses are shown. **B**, Comparison of CD68+CD163+ and CD14+CD163+ cell frequency in MPE. Results are presented as a scatter diagram.

## Supplementary Figure S2

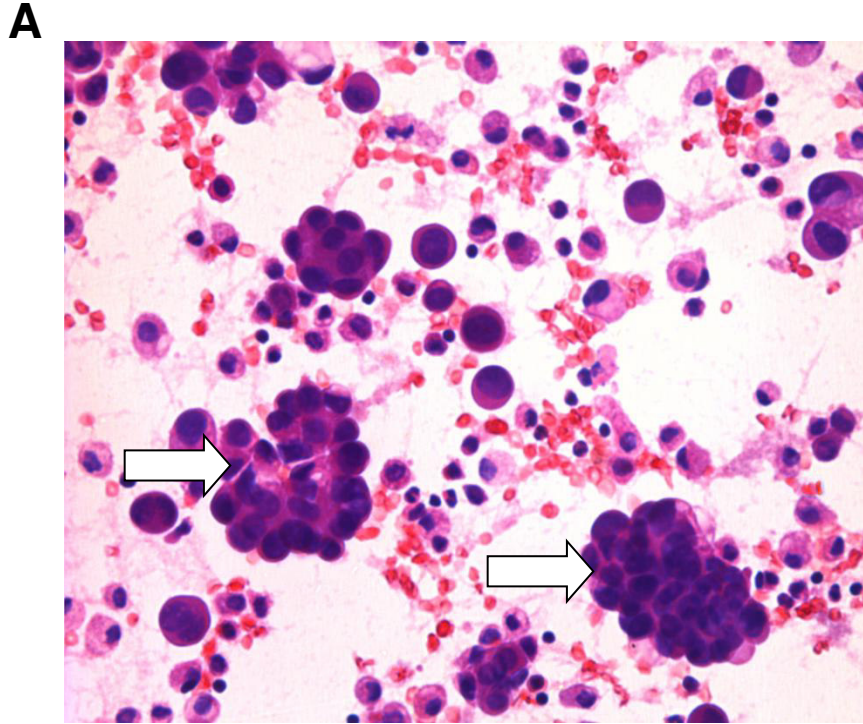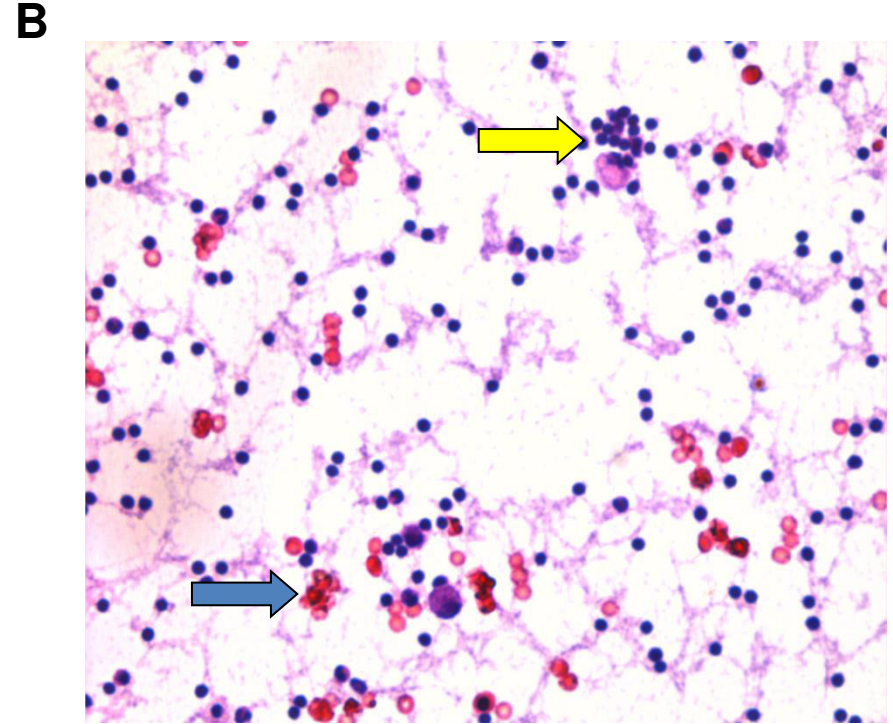

### Supplementary Figure S2. Cytological analysis of MPE and NMPE.

**A**, Red blood cells, lymphocytes, and adenocarcinoma cells with deep-stained large nuclei (white arrow) were visualized in pleural effusion from a lung cancer patient by using sedimentation smear microscopy ( $\times 400$ ). One representative analysis is shown.

**B**, More red blood cells (blue arrow), lymphocytes (yellow arrow) and a few mesothelial cells were visualized in inflammatory pleural effusion by using microscopy ( $\times 400$ ). One representative analysis is shown.

## Supplementary Figure S3

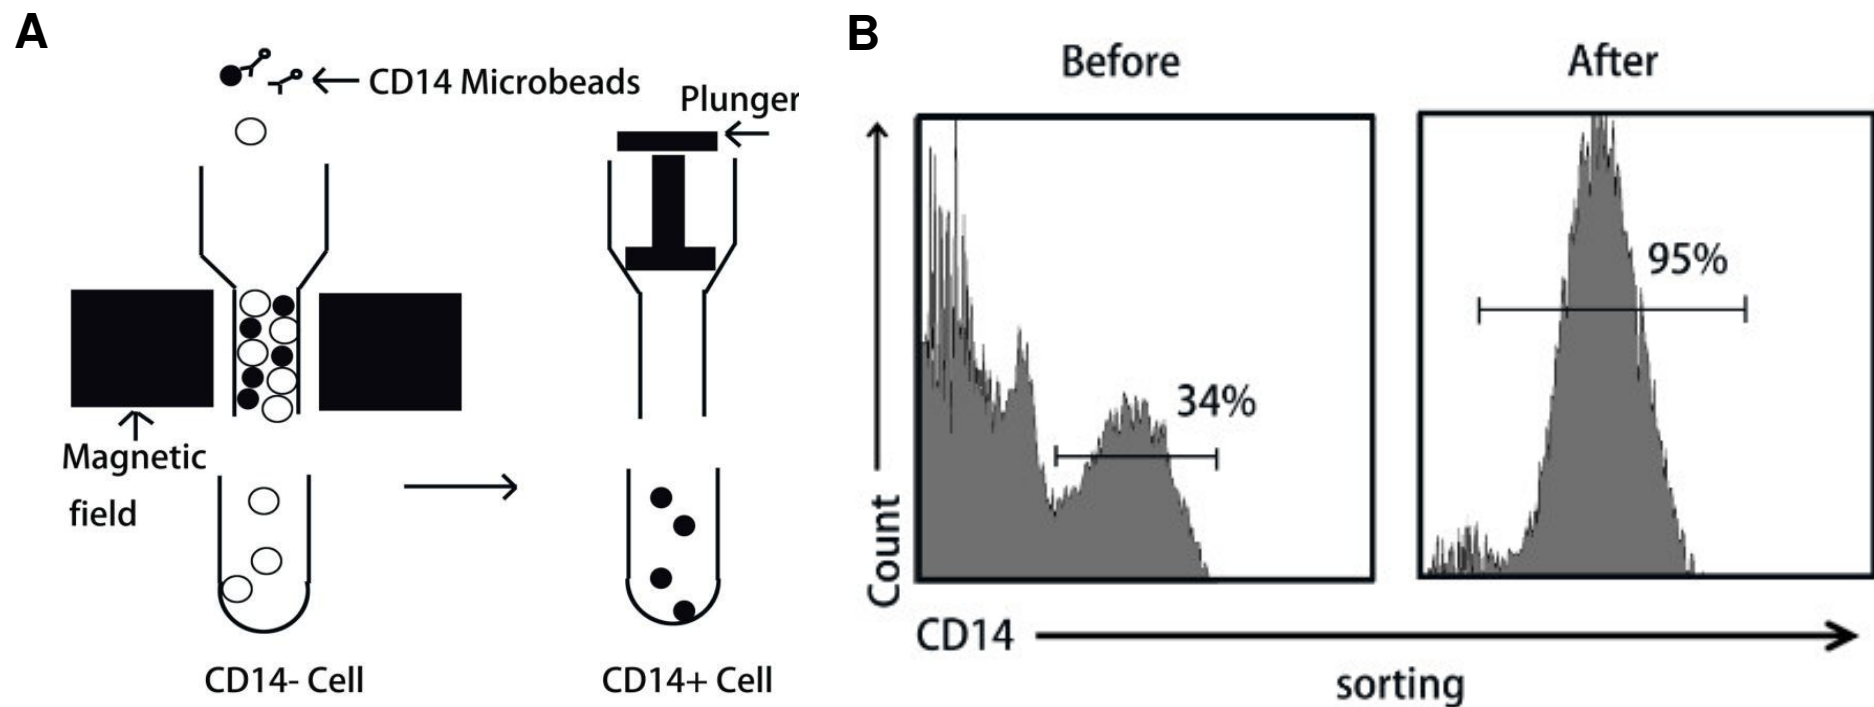

### Supplementary Figure S3. CD14+ monocytes were purified using MACS.

**A**, CD14+ cells were sorted from pleural effusion-derived mononuclear cells by using MACS. The sorting procedure is depicted in the diagram. **B**, CD14 was labeled on these purified and non-purified cells. The purities of CD14+ cells were analyzed before and after sorting by flow cytometry.

## Supplementary Figure S4

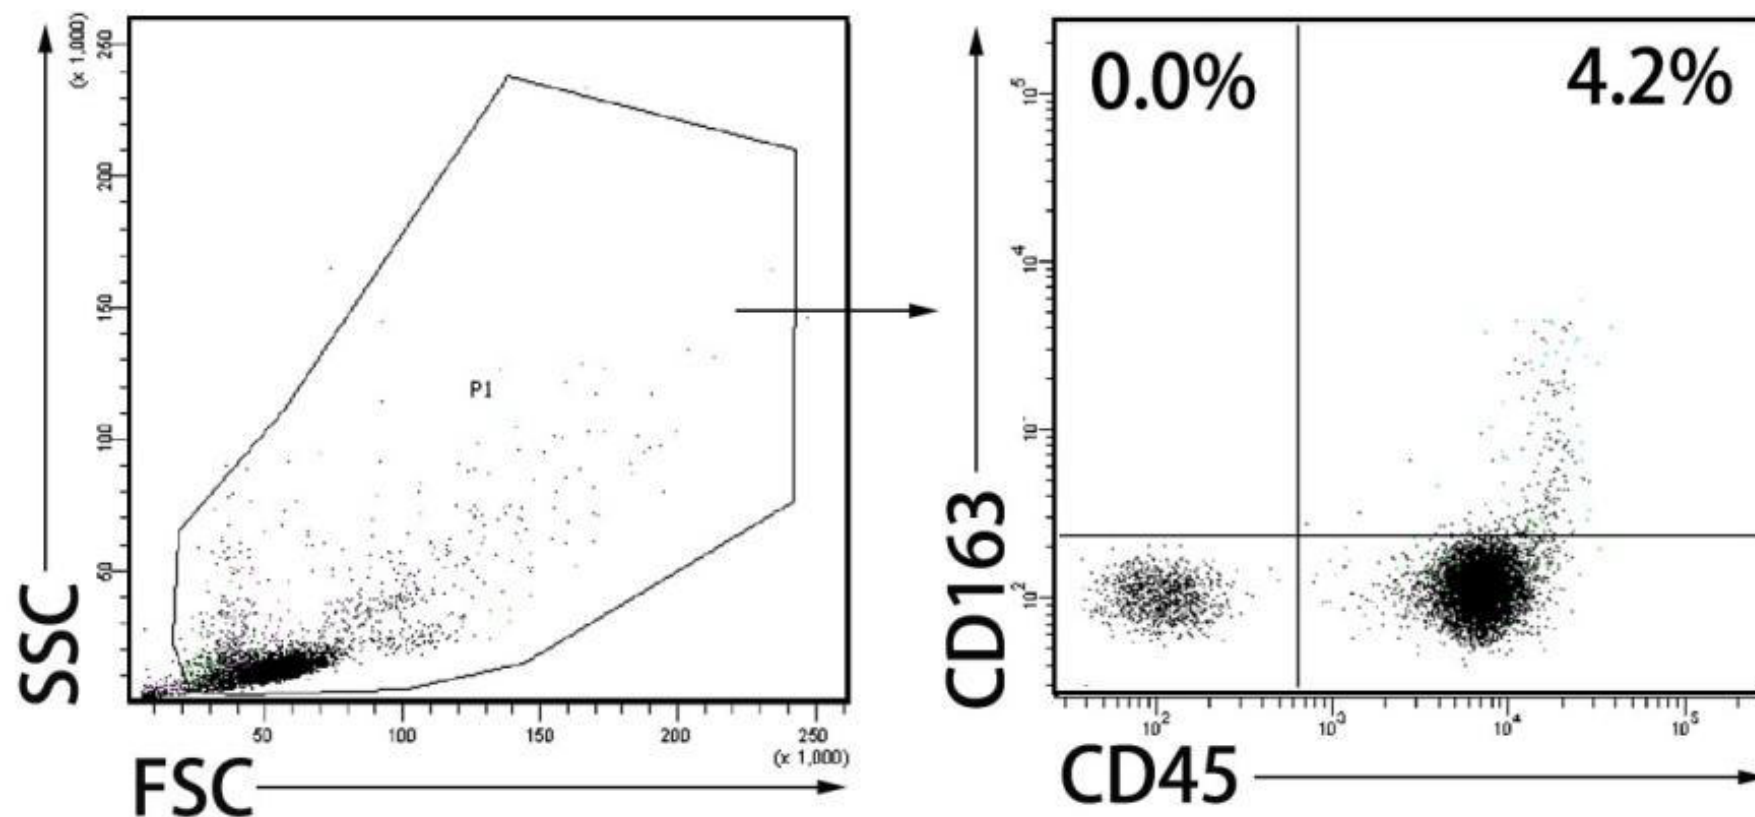

**Supplementary Figure S4. Flow cytometry analysis of mononuclear cells with anti-CD45 and anti-CD163 antibodies labeling.**

Mononuclear cells from pleural effusion or peripheral blood were stained with human anti-CD45 and anti-CD163 antibodies. One representative analysis is shown.

## Supplementary Figure S5

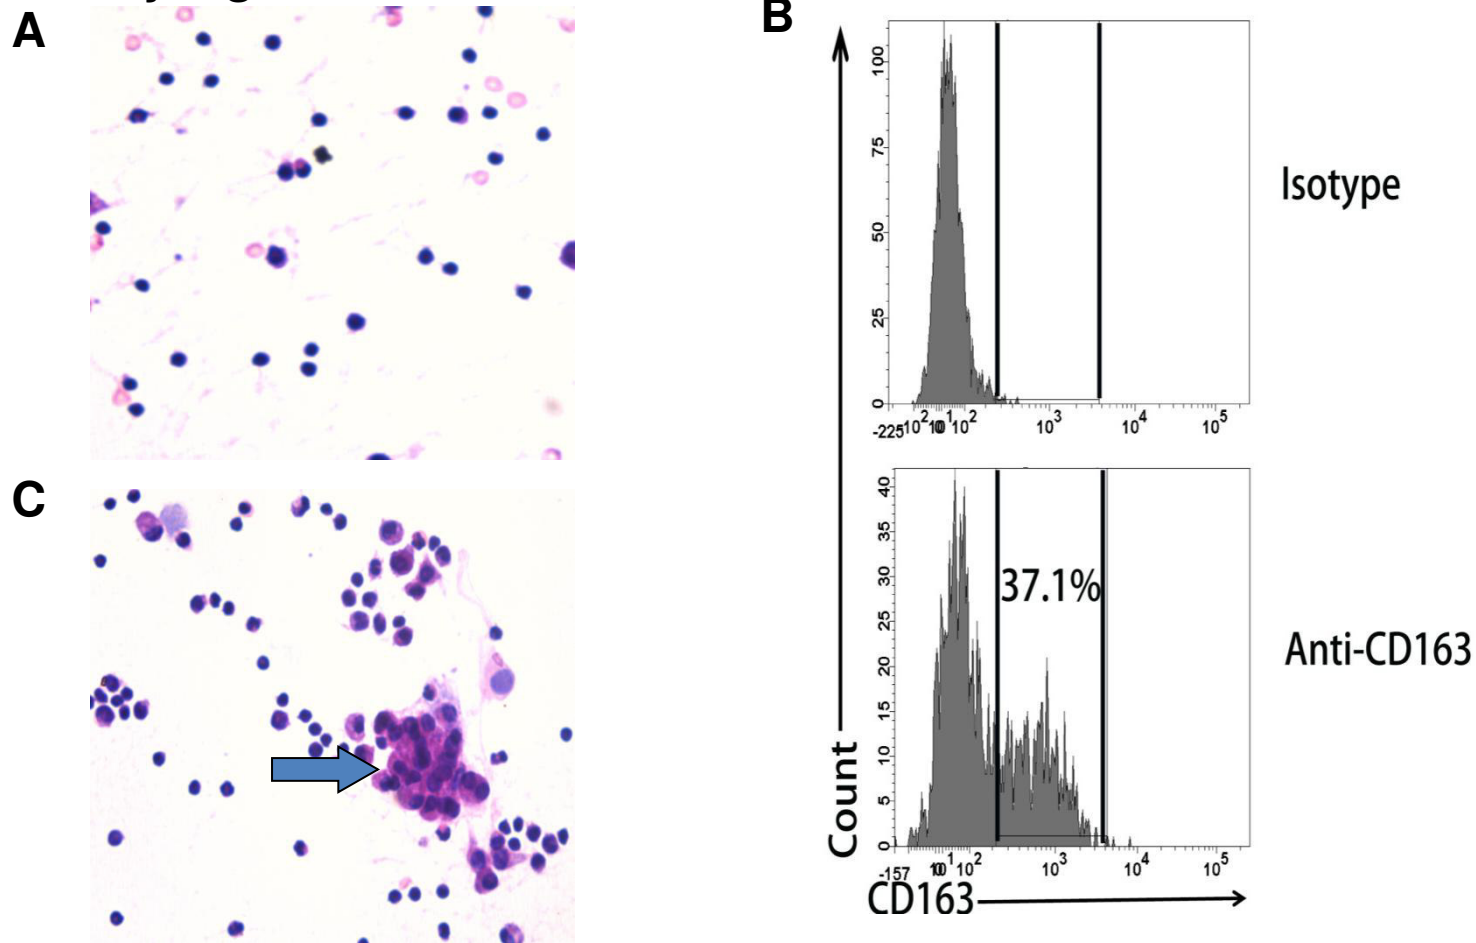

**Supplementary Figure S5. High percentage of CD163+CD14+ cells in pleural effusion confirmed to be MPE by tumor cytology.**

**A**, Tumor cells were primarily not detected in pleural effusion by tumor cytology. One representative analysis is shown. Only lymphocytes and mesothelial cells were observed by microscopy ( $\times 400$ ). **B**, CD163+ cell frequency was analyzed by flow cytometry. **C**, Presence of tumor cells with deep-stained large nuclei (arrow) in pleural effusion from the same patient was ultimately confirmed by cytological analysis ( $\times 400$ ).
